# Supplementary material for: Facile synthesis of acetylated dendrimer-entrapped gold nanoparticles with enhanced gold loading for CT imaging applications
Source: Royal Society of Chemistry journal article supplement (doi:10.1039/c3tb20399a), 2013-01-01
Supplement: c3tb20399a.pdf [file c3tb20399a.pdf]

## Electronic Supplementary Information

### Facile synthesis of acetylated dendrimer-entrapped gold nanoparticles with enhanced gold loading for CT imaging applications†

Tingting Xiao,<sup>‡a</sup> Shihui Wen,<sup>‡b</sup> Han Wang,<sup>‡c</sup> Hui Liu,<sup>b</sup> Mingwu Shen,<sup>b</sup> Jinglong Zhao,<sup>\*c</sup> Guixiang Zhang,<sup>c</sup> Xiangyang Shi<sup>\*abd</sup>

<sup>a</sup> State Key Laboratory for Modification of Chemical Fibers and Polymer Materials, College of Materials Science and Engineering, Donghua University, Shanghai 201620, People's Republic of China

<sup>b</sup> College of Chemistry, Chemical Engineering and Biotechnology, Donghua University, Shanghai 201620, People's Republic of China

<sup>c</sup> Department of Radiology, Shanghai First People's Hospital, School of Medicine, Shanghai Jiaotong University, Shanghai 200080, People's Republic of China

<sup>d</sup> CQM-Centro de Química da Madeira, Universidade da Madeira, Campus da Penteadá, 9000-390 Funchal, Portugal

---

\* To whom correspondence should be addressed. Fax: 0086-21-67792306-804; Tel: 0086-21-67792656.

E-mail: [xshi@dhu.edu.cn](mailto:xshi@dhu.edu.cn)

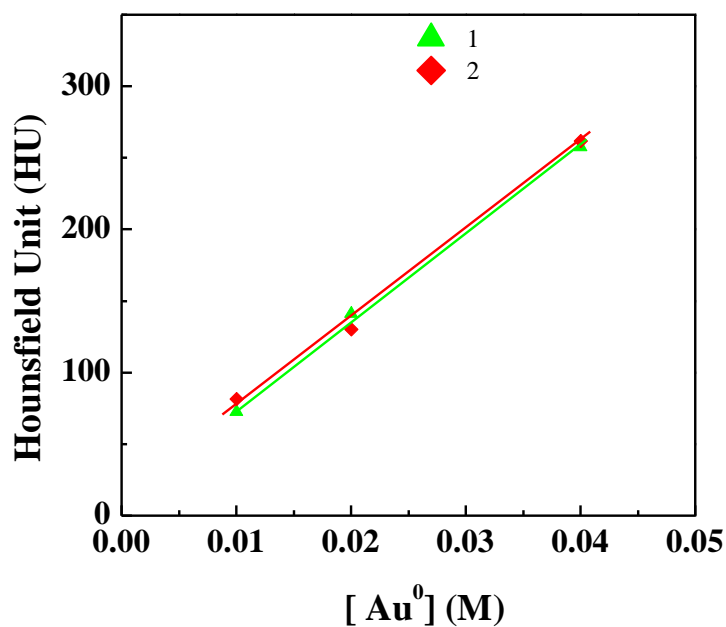

**Figure S1.** X-ray attenuation (HU) of [(Au<sup>0</sup>)<sub>120</sub>-G5.NHAc] DENPs (1) and [(Au<sup>0</sup>)<sub>300</sub>-G5.NHAc-*m*PEG<sub>20</sub>] DENPs (2) as a function of the molar concentration of Au.

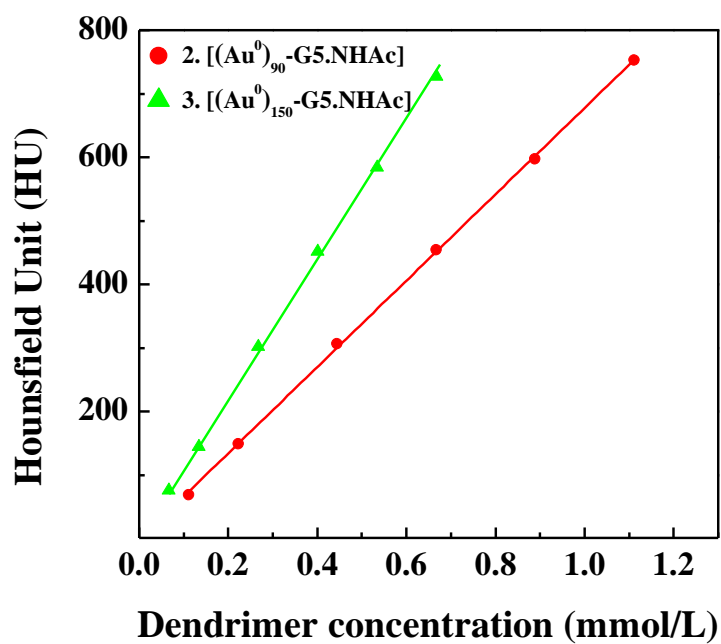

**Figure S2.** X-ray attenuation (HU) of [(Au<sup>0</sup>)<sub>n</sub>-G5.NHAc] DENPs (n=90 (2), 150 (3)) as a function of the molar concentration of dendrimer.
